# Supplementary material for: Piezoelectric performance enhancement of ZnO flexible nanogenerator by a CuO–ZnO p–n junction formation
Source: Royal Society of Chemistry journal article supplement (doi:10.1039/c3tc31664e), 2013-01-01
Supplement: c3tc31664e.pdf [file c3tc31664e.pdf]

## Piezoelectric performance enhancement of ZnO flexible nanogenerator by a CuO-ZnO p-n junction formation

Sung-Ho Shin<sup>a</sup>, Min-Hyung Lee<sup>b</sup>, Joo-Yun Jung<sup>c</sup>, Jae Hun Seol<sup>d</sup>, Junghyo Nah<sup>\*a</sup>

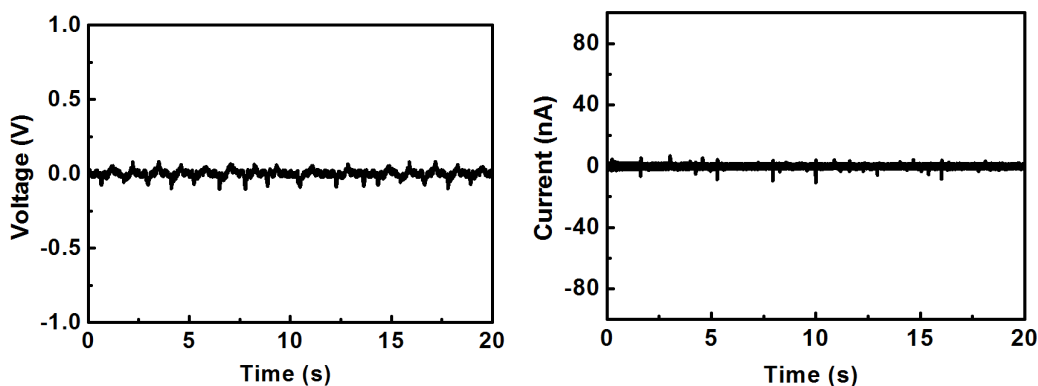

Fig S1. The output voltage and current of Au/PET/Cu device, measured in forward connection. No obvious out signal can be observed. (applied force 0.6 kgf)

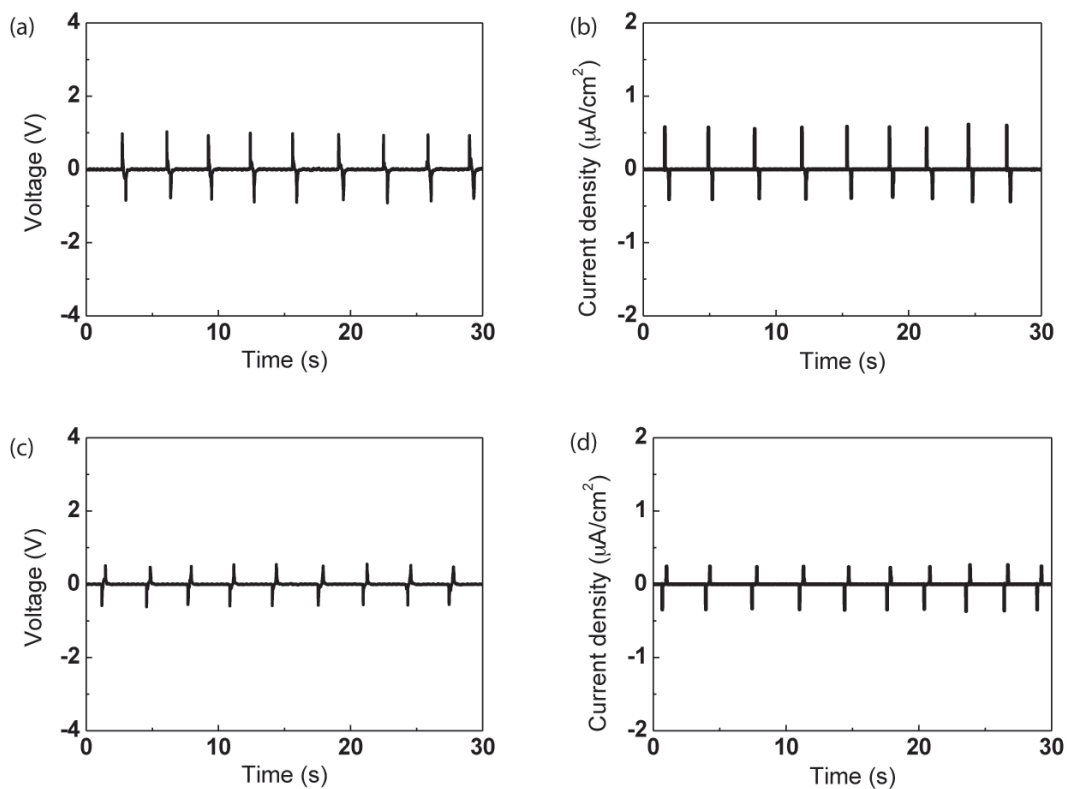

Fig S2. The output voltage and current of Au/ZnO(60nm)/PET/Cu device, measured under forward connection (a, b) and reverse connection (c, d).

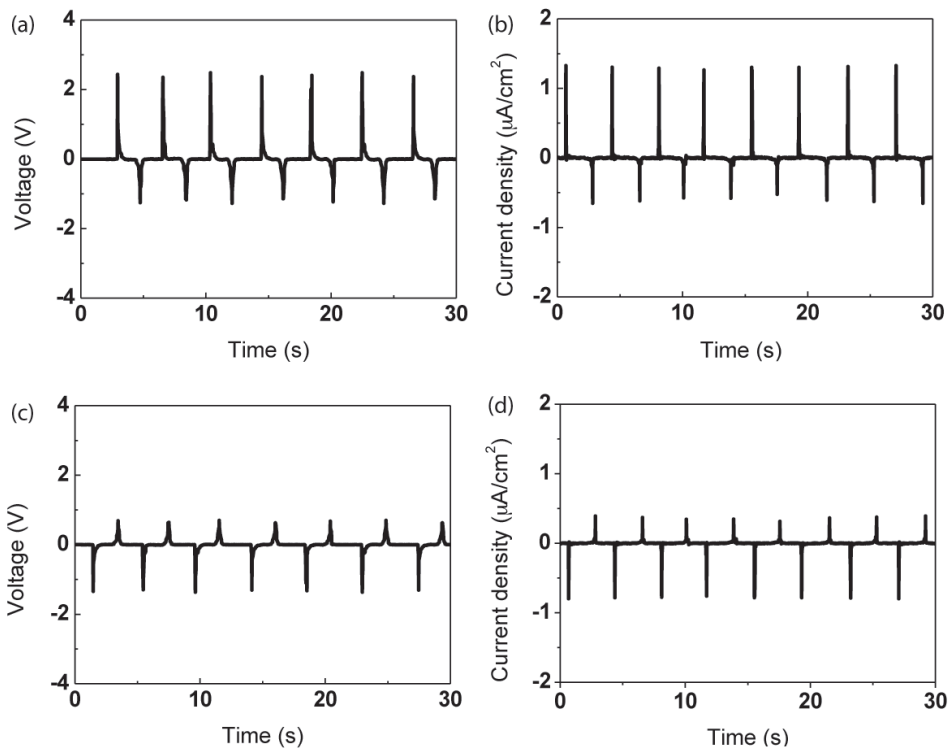

Fig S3. The output voltage and current of Au/ZnO(100nm)/CuO(100nm)/PET/Cu device, measured under forward connection (a, b) and reverse connection (c, d) .

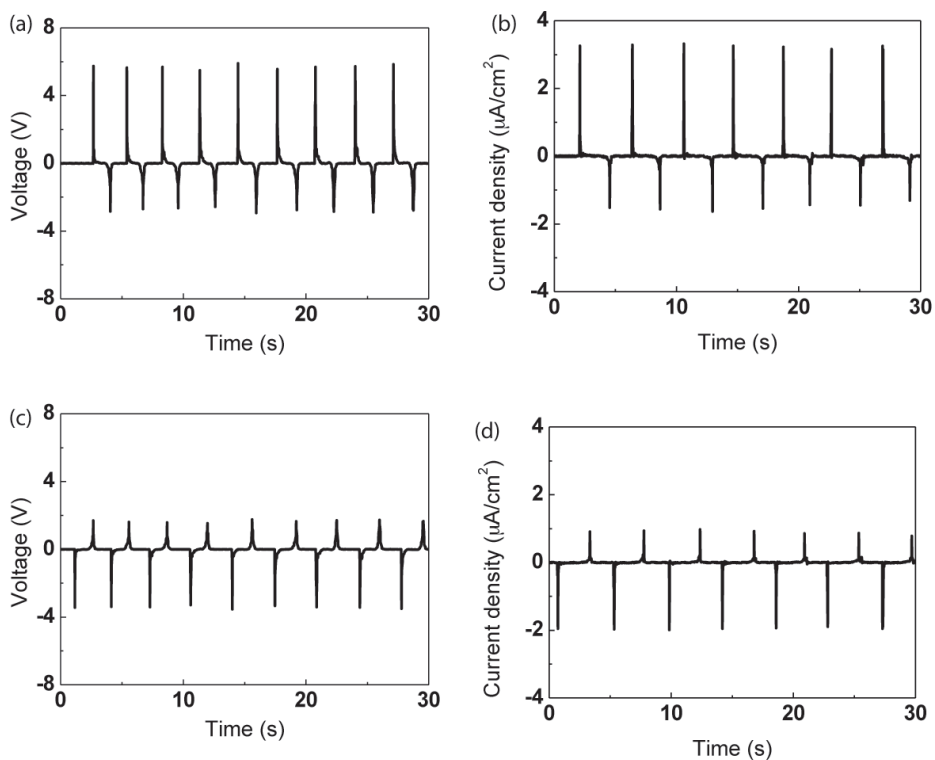

Fig S4. The output voltage and current of Au/ZnO(60nm)/CuO(100nm)/PET/Cu device, measured under forward connection (a, b) and reverse connection (c, d) .

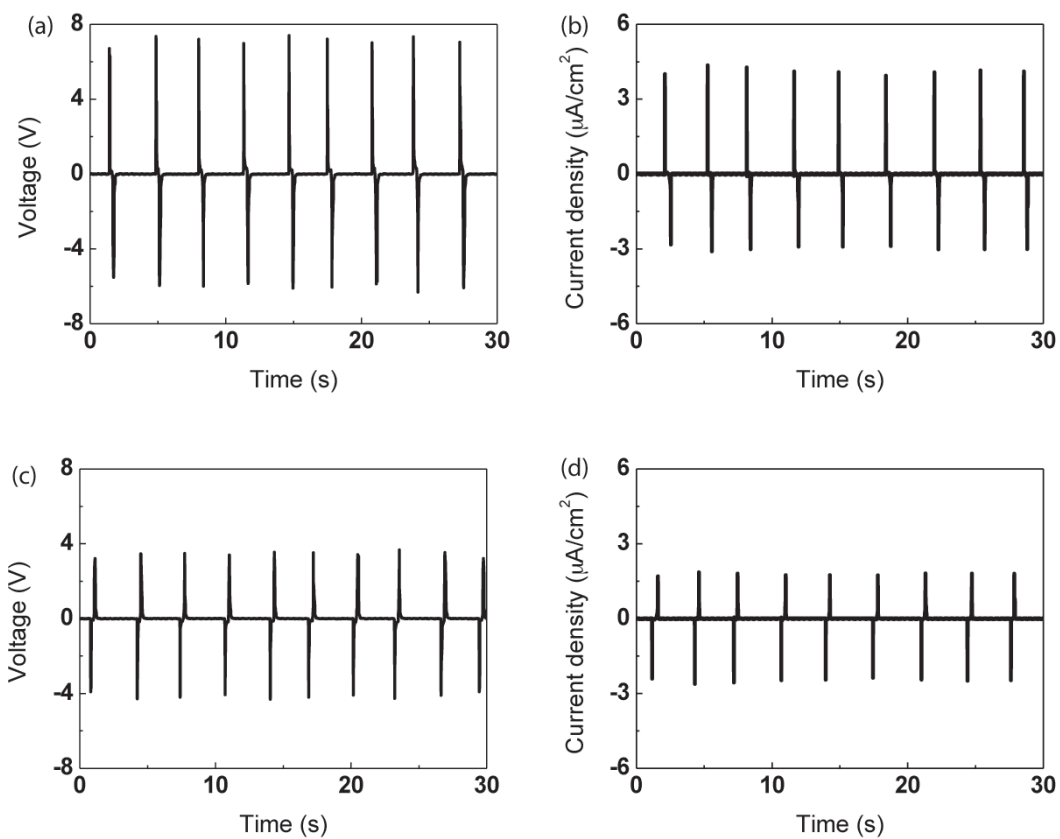

Fig S5. The output voltage and current of Au/ZnO(60nm)/CuO(300nm)/PET/Cu device, measured under forward connection (a, b) and reverse connection (c, d).

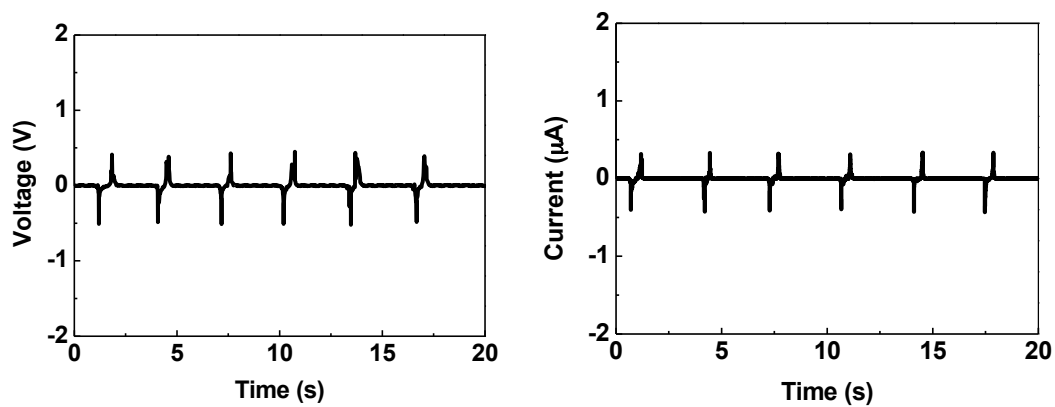

Fig S6. Downward bending output characteristics.
